# Supplementary material for: Investigation of Dye Dopant Influence on Electrooptical and Morphology Properties of Polymeric Acceptor Matrix Dedicated for Ternary Organic Solar Cells
Source: MDPI journal article supplement (doi:10.3390/polym13234099), 2021-11-25
Supplement: s1 [file s1]

# Investigation of Dye Dopant Influence on Electrooptical and Morphology Properties of Polymeric Acceptor Matrix Dedicated for Ternary Organic Solar Cells

Gabriela Lewińska <sup>1,\*</sup>, Piotr Jeleń <sup>2</sup>, Jarosław Kanak <sup>1</sup>, Łukasz Walczak <sup>3</sup>, Robert Socha <sup>4</sup>, Maciej Sitarz <sup>2</sup>, Jerzy Sanetra <sup>†</sup> and Konstanty W. Marszałek <sup>1</sup>

<sup>1</sup> AGH University of Science and Technology, Faculty of Computer Science, Electronics and Telecommunication, 30 Mickiewicza Ave., 30-059 Krakow, Poland;

[kanak@agh.edu.pl](mailto:kanak@agh.edu.pl) (J.K.); [marszalek@agh.edu.pl](mailto:marszalek@agh.edu.pl) (K.W.M.)

<sup>2</sup> Department of Silicate Chemistry and Macromolecular Compounds, Faculty of Materials Science and Ceramics, AGH University of Science and Technology; 30-059 Krakow, Poland; [pjelen@agh.edu.pl](mailto:pjelen@agh.edu.pl) (P.J.), [msitarz@agh.edu.pl](mailto:msitarz@agh.edu.pl) (M.S.)

<sup>3</sup> Science & Research Division, PREVAC sp. z o.o., Raciborska 61, 44-362 Rogow, Poland; [lukasz.walczak@prevac.pl](mailto:lukasz.walczak@prevac.pl)

<sup>4</sup> Jerzy Haber Institute of Catalysis and Surface Chemistry, Polish Academy of Sciences, Niezapominajek 8, 30239 Krakow, Poland; [robert.socha@ikifp.edu.pl](mailto:robert.socha@ikifp.edu.pl)

\* Correspondence: [glewinska@agh.edu.pl](mailto:glewinska@agh.edu.pl); Tel.: + 48-692-376-639

† The author Jerzy Sanetra is retired ; [jsanetra@agh.edu.pl](mailto:jsanetra@agh.edu.pl)

The table presents data on the tested materials.

**Table S1.** Information about materials (\*based on manufacturer's data [1])

| Abbreviation | Full chemical name                                                                                                                                                                           | Empirical Formula                                                               | Molecular weight (u) | Purity* HPLC (%) |
|--------------|----------------------------------------------------------------------------------------------------------------------------------------------------------------------------------------------|---------------------------------------------------------------------------------|----------------------|------------------|
| Dye D131     | 2-cyano-3-[4-[4-(2,2-diphenylethenyl)phenyl]-1,2,3,3a,4,8b-hexahydrocyclopent[b]indol-7-yl]-2-propenoic acid                                                                                 | C <sub>35</sub> H <sub>28</sub> N <sub>2</sub> O <sub>2</sub>                   | 508.61               | >95              |
| Dye D149     | 5-[[4-[4-(2,2-diphenylethenyl)phenyl]-1,2,3,3a,4,8b-hexahydrocyclopent[b]indol-7-yl]methylene]-2-(3-ethyl-4-oxo-2-thioxo-5-thiazolidinylidene)-4-oxo-3-thiazolidineacetic acid               | C <sub>42</sub> H <sub>35</sub> N <sub>3</sub> O <sub>4</sub><br>S <sub>3</sub> | 741.94               | 98               |
| Dye D205     | 5-[[4-[4-(2,2-diphenylethenyl)phenyl]-1,2,3,3a,4,8b-hexahydrocyclopent[b]indol-7-yl]methylene]-2-(3-octyl-4-oxo-2-thioxo-5-thiazolidinylidene)-4-oxo-3-thiazolidineacetic acid               | C <sub>48</sub> H <sub>47</sub> N <sub>3</sub> O <sub>4</sub> S<br>3            | 826.10               | 97               |
| Dye D358     | 5-[3-(carboxymethyl)-5-[[4-[4-(2,2-diphenylethenyl)phenyl]-1,2,3,3a,4,8b-hexahydrocyclopent[b]indol-7-yl]methylene]-4-oxo-2-thiazolidinylidene]-4-oxo-2-thioxo-3-thiazolidinedodecanoic acid | C <sub>52</sub> H <sub>53</sub> N <sub>3</sub> O <sub>6</sub> S<br>3            | 912.19               | 95               |

Dispersion relationships are discussed below [2].

Tauc - Lorentz absorption formula is as follows Lorentz [3,4]

$$\varepsilon_2 \propto (E - E_g)^2 / E_g^2$$

and Cody – Lorentz model is shown by the equation [5]

$$\varepsilon_2 \propto (E - E_g)^2$$

Detailed Cody absorption formula is describe by

$$\varepsilon_{n_{CL}} = \varepsilon_{n1} + i\varepsilon_{n2}$$

where

$$\varepsilon_2(E) = \begin{cases} \frac{E_1}{E} \exp\left(\frac{E - E_{gn} - E_{tn}}{E_{un}}\right) & 0 < E \leq E_{gn} + E_{tn} \\ G(E)L(E) = \frac{(E - E_{gn})^2}{(E - E_{gn})^2 - E_{pn}^2} - \frac{A_n E_{on} \Gamma_n E}{(E - E_{on})^2 + \Gamma_n^2 E^2} & ; E > E_{gn} - E_{tn} \end{cases}$$

$$E_1 = (E_{gn} + E_n)G(E_{gn} + E_{tn})L(E_{gn} + E_{tn})$$

$$\varepsilon_{n1} = \frac{2}{\pi} P \int_0^\infty \frac{\xi \varepsilon_{n2}(\xi)}{\xi^2 - E^2} d\xi$$

Where

$n \equiv$  oscillator,  $E_g \equiv$  bandgap,  $\varepsilon_1, \varepsilon_2 \equiv$  the real and imaginary parts of the dielectric function,  $G(E) \equiv$  nearbandgap function,  $L(E) \equiv$  Lorentz oscillator function,  $E_t, E_p$  transition energies

The detailed Tauc-Lorentz absorption formula is described by

$$\varepsilon_2(E) = \frac{AE_0\Gamma(E - E_g)^2}{E[(E^2 - E_0^2)^2 - \Gamma^2 E^2]} \Theta(E - E_g)$$

$E_g$  is the band gap of the material,  $A$  is a refractor, which includes the optical transition matrix elements., a  $\Theta$  is the Heaviside Theta function,  $E_0$  is the peak in the joint density of states,  $\Gamma$  is the broadening parameter.

The real part of the TL dielectric function is

$$\varepsilon_1(E) = n^2(E) - k^2(E)$$

**Table S2.** Thicknesses of investigated layers determined by spectroscopic ellipsometry

|          | Single dye thicknesses<br>(nm) | Dye: P3HT: PCBM<br>(nm) |
|----------|--------------------------------|-------------------------|
| Dye D131 | 108.0                          | 49.1                    |
| Dye D149 | 82.0                           | 48.4                    |
| Dye D205 | 80.5                           | 47.9                    |
| Dye D358 | 65.9                           | 50.4                    |

In the Figure S1, the profiles obtained from AFM measurements for the studied mixtures are shown.

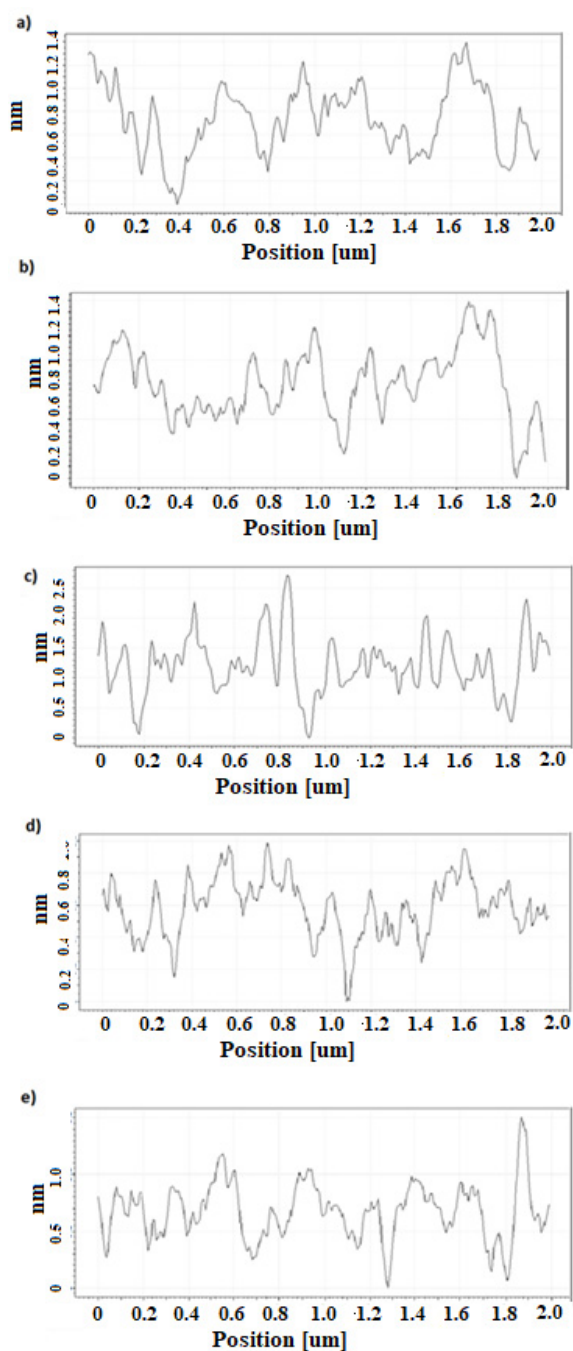

**Figure S1.** AFM profiles for the tested mixtures a) P3HT:PCBM b) dye D131:P3HT:PCBM c) dye D149:P3HT:PCBM d) dye D205:P3HT:PCBM e) dye D358:P3HT:PCBM

## References

1. Merck | Nauki biomedyczne | Substancje chemiczne dla przemysłu i laboratorium | eSklep  
Available online: <https://www.merckmillipore.com/PL/pl> (accessed on Nov 9, 2021).
2. Woollam Co, J. Complete EASE, Software Manual. **2007**.
3. Jellison, G.E.; Modine, F.A. Parameterization of the optical functions of amorphous materials in the interband region. *Appl. Phys. Lett.* **1996**, *69*, 371–373.
4. Jellison, G.E.; Jr.; Merkulov, V.I.; Puretzky, A.A.; Geohegan, D.B.; Eresa, G.; Lowndes, D.H.; Caughman, J.B. Characterization of thin-film amorphous semiconductors using spectroscopic ellipsometry. *Thin Solid Films* **2000**, 377–378, 68.
5. Ferlauto, A.S.; Ferreira, G.M.; Pearce, J.M.; Wronski, C.R.; Collins, R.W.; Deng, X.; Ganguly, G. Analytical model for the optical functions of amorphous semiconductors from the near-infrared to ultraviolet: Applications in thin film photovoltaics. *J. Appl. Phys.* **2002**, *92*, 2424–2436.
